# Supplementary material for: A rapid and robust selection procedure for generating drug-selectable marker-free recombinant malaria parasites
Source: PubMed Central journal article supplement — Sci Rep. 2014 Apr 23;4:4760. doi: 10.1038/srep04760 (PMC3996467; doi:10.1038/srep04760), 2014-04-23

## **A rapid and robust selection procedure for generating drug-selectable marker-free recombinant malaria parasites**

Giulia Manzoni<sup>1,2,3§</sup>, Sylvie Briquet<sup>1,2,3§</sup>, Veronica Risco-Castillo<sup>1,2,3</sup>, Charlotte Gaultier<sup>1,2,3</sup>, Selma Topçu<sup>1,2,3</sup>, Maria Larisa Ivănescu<sup>1,2,3</sup>, Jean-François Franetich<sup>1,2,3</sup>, Bénédicte Hoareau<sup>4</sup>, Dominique Mazier<sup>1,2,3,5</sup>, Olivier Silvie<sup>1,2,3\*</sup>

<sup>1</sup>Sorbonne Universités, UPMC Univ Paris 06, CR7, Centre d'Immunologie et des Maladies Infectieuses (CIMI-Paris), 75013, Paris, France. <sup>2</sup>INSERM, U1135, CIMI-Paris, 75013, Paris, France. <sup>3</sup>CNRS, ERL 8255, CIMI-Paris, 75013, Paris, France. <sup>4</sup>Sorbonne Universités, UPMC Univ Paris 06, Plateforme de Cytométrie en Flux CyPS, site Pitié-Salpêtrière, Paris, France. <sup>5</sup>Assistance Publique-Hôpitaux de Paris, Groupe Hospitalier Pitié-Salpêtrière, Service de Parasitologie-Mycologie, Paris, France.

§GM and SB contributed equally to the work

\*Correspondence and requests for materials should be addressed to O.S. (olivier.silvie@inserm.fr).

### **SUPPLEMENTARY INFORMATION**

#### **SUPPLEMENTARY FIGURE LEGENDS**

##### **Figure S1. GOMO plasmid maps**

A. The GOMO-GFP plasmid contains 1) a GFP coding sequence (0.7 kb, green box) under control of the constitutive *PbHSP70* promoter (1.9 kb) 2) a hDHFR-yFCU fusion gene (2.1 kb, dark and light blue boxes), for positive-negative selection 3) a mCherry coding sequence (0.7

kb, red box). Both hDHFR-yFCU and mCherry are placed under control of a single bidirectional *PbeEF1α* promoter (1.0 kb). The GFP and mCherry reporter genes are followed by the same sequence corresponding to the 3' UTR of *P. berghei DHFR-TS* (1.0 kb, orange box and lollipop), placed in the same orientation, which serves both as a transcription terminator and for excision of the drug resistance cassette after recombination. The hDHFR-yFCU coding sequence is followed by the 3' UTR of *PbHSP70* (0.7 kb, blue lollipop). For homologous recombination gene deletion, two fragments of the target gene can be introduced on each side of the cassettes, in *SacII* and *NotI*, and *XhoI* and *KpnI* restriction sites, respectively.

B. The GOMO-GFP-LUC plasmid contains the same elements as the GOMO-GFP vector, except that the GFP coding sequence was replaced by a GFP-Luciferase fusion gene (2.4 kb, light and dark green boxes), placed under control of the *PbeEF1α* promoter (0.6 kb).

Plasmid maps are represented not at scale.

### **Figure S2. Gating strategy for flow cytometry-assisted sorting of drug-selectable marker-free recombinant parasites**

*P. berghei* ANKA parasites were transfected with a GOMO-GFP construct for *PbP230p* gene replacement. After positive selection with pyrimethamine, GFP<sup>+</sup> mCherry<sup>+</sup> parasites (A) were sorted by flow cytometry, and submitted to negative selection with 5-FC for sorting of GFP<sup>+</sup> mCherry<sup>-</sup> parasites (B). For gating, singlets were first selected using forward scatter height (FSC-H) and forward scatter area (FSC-A) (left panels). Then small particles and debris and large cells were excluded and the predominant population of red blood cells (RBCs) selected using forward scatter area (FSC-A) and side scatter area (SSC-A) (middle panels). Finally, GFP<sup>+</sup> mCherry<sup>+</sup> (A) or GFP<sup>+</sup> mCherry<sup>-</sup> (B) infected erythrocytes were gated and sorted (open red and green boxes, respectively).

**Figure S3. Alternative integration of the GOMO constructs at the parasite *DHFR/TS* locus**

A-B. After transfection with GOMO-GFP (A) or GOMO-GFP-LUC (B) constructs, a double crossover recombination at the 3' end of the *DHFR/TS* locus can occur, due to the presence of the repeated *PbDHFR/TS* 3' element (pink lollipop), resulting in integration of the hDHFR-yFCU and mCherry cassettes into the parasite genome. A second recombination event results in excision of the double cassette and restoration of a WT *DHFR/TS* locus.

C-D. PCR analysis of genomic DNA isolated from *P.berghei* parasites transfected with GOMO-GFP (C) or GOMO-GFP-LUC (D) constructs targeting the *PbP230p* gene, after positive selection with pyrimethamine but before 5-FC exposure. Confirmation of construct integration at the *PbDHFR/TS* locus was achieved with primer combinations specific for 5' or 3' integration.

**Figure S4. Alternative integration of the GOMO constructs at the parasite *eEF1 $\alpha$*  locus**

After transfection with a GOMO-GFP-LUC construct, a double crossover recombination in the endogenous *eEF1 $\alpha$*  promoter region may theoretically also occur, due to the presence of the two repeated *eEF1 $\alpha$*  promoter elements in the construct, but could not be documented in this study. This would result in integration of the hDHFR-yFCU and GFP-LUC cassettes in the parasite genome. A second recombination event results in excision of the two cassettes and restoration of a WT *eEF1 $\alpha$*  locus.

**Figure S5. Alternative excision of the GFP-LUC and hDHFR-yFCU cassettes results in drug-selectable marker-free mCherry expressing parasites**

A. After integration of a GOMO-GFP-LUC construct at the target gene locus, a second recombination event can occur between the repeated *eEF1 $\alpha$*  promoter sequences instead of the *PbDHFR/TS* 3' elements, resulting in excision of the GFP-LUC cassette together with the hDHFR-yFCU selection marker, and persistence of the mCherry cassette.

B. *P. berghei* ANKA parasites were transfected with a GOMO-GFP-LUC construct for *PbP230p* gene replacement. After positive and negative selection, a population of GFP<sup>-</sup> mCherry<sup>+</sup> parasites was obtained and sorted by FACS, and their genomic DNA analysed by PCR. Confirmation of *PbP230p* gene deletion was achieved with primer combinations specific for 5' or 3' integration. Excision of the GFP-LUC cassette was confirmed using a primer combination specific for the 5' excision event (5' excised).

**Figure S6. Replacement strategy to generate drug-selectable marker-free  $\Delta$ *slarp*-GFP and  $\Delta$ *slarp*-GFP-LUC *P. berghei* ANKA parasites**

The wild-type (WT) genomic locus of *P. berghei* *SLARP* (PBANKA\_090210) was targeted with GOMO-GFP (A) and GOMO-GFP-LUC (B) replacement plasmids containing a 5' and a 3' homologous sequence inserted on each side of the plasmid cassettes. Upon a double crossover event, the *SLARP* gene is replaced by the GFP(-LUC)/hDHFR-yFCU/mCherry triple cassette. Recombination between the *PbDHFR/TS* 3' UTR repeated sequences (pink lollipops) results in excision of the hDHFR-yFCU and mCherry cassettes. Replacement- and wild type- specific test primer combinations and expected PCR fragments (WT, 5' integration, 3' integration and 3' marker excised) are indicated by arrows and lines, respectively. The Southern probe and expected restriction fragments are also shown.

**Figure S7. Replacement strategy to generate drug-selectable marker-free  $\Delta$ *p230p*-GFP and  $\Delta$ *p230p*-GFP-LUC *P. yoelii* 17XNL parasites**

The wild-type (WT) genomic locus of *P. yoelii* *P230p* (PY03857) was targeted with GOMO-GFP (A) and GOMO-GFP-LUC (B) replacement plasmids containing a 5' and a 3' homologous sequence inserted on each side of the plasmid cassettes. Upon a double crossover event, the *P230p* gene is replaced by the GFP(-LUC)/hDHFR-yFCU/mCherry triple cassette. Recombination between the *PbDHFR/TS* 3' UTR repeated sequences (pink lollipops) results in excision of the hDHFR-yFCU and mCherry cassettes. Replacement- and wild type-specific test primer combinations and expected PCR fragments (WT, 5' integration, 3' integration and 3' marker excised) are indicated by arrows and lines, respectively.

## **SUPPLEMENTARY MOVIE LEGENDS**

### **Supplementary movie 1**

Movie showing the end of sporozoite transformation and the beginning of liver stage development of a  $\Delta p230p$ -GFP *P. berghei* parasite inside a HepG2 cell. Time labels are expressed in hours:minutes. Bar, 10  $\mu$ m.

### **Supplementary movie 2**

Movie showing the end of sporozoite transformation and the beginning of liver stage development of a  $\Delta p230p$ -GFP *P. berghei* parasite inside a HepG2 cell. Time labels are expressed in hours:minutes. Bar, 10  $\mu$ m.

### **Supplementary movie 3**

Movie showing two intracellular  $\Delta slarp$ -GFP *P. berghei* parasites inside HepG2 cells. The parasites do not develop and disappear at 12:45 and 17:45, respectively. Time labels are expressed in hours:minutes. Bar, 10  $\mu$ m.

#### **Supplementary movie 4**

Movie showing an intracellular  $\Delta slarp$ -GFP *P. berghei* parasite inside a HepG2 cell. The parasite does not develop and disappears at 10:45. Time labels are expressed in hours:minutes.

Bar, 10  $\mu\text{m}$ .

#### **Supplementary movie 5**

Movie showing two intracellular  $\Delta slarp$ -GFP *P. berghei* parasites inside HepG2 cells. The parasites do not develop and disappear at 9:05 and 15:25, respectively. Time labels are expressed in hours:minutes. Bar, 10  $\mu\text{m}$ .

**Table S1. List of oligonucleotides.**

| <b>Experiment</b>                                          | <b>Oligonucleotide name</b> | <b>Sequence 5' → 3'</b>                                        |
|------------------------------------------------------------|-----------------------------|----------------------------------------------------------------|
|                                                            | eEFlaBidirPromFor           | CGGggtaccCGctcgagCGcctaggTATAAAATTTTATTTATTTATAAGC             |
|                                                            | eEFlaBidirPromRev           | CGcaattgCGtgatcaCGgtcgacTATAAAATTTTATTTATTTATAAGC              |
|                                                            | mCherryFor                  | CCGcctaggAAAATGGTGAGCAAGGGCGAGG                                |
|                                                            | mCherryRev                  | CCGctcgagTTACTTGTACAGCTCGTCCATG                                |
|                                                            | PbDHFRutr1For               | ATAAGAATgcgccgcagtGAATTCTGTTCGTTTTTCTTATTTATATATTTATAACC       |
|                                                            | PbDHFRutr1Rev               | CGCAATTGTGAAATTAATAAAATAAAATACATATCCCTC                        |
|                                                            | PbDHFRutr2For               | ACGCGTCGACTGTTTCGTTTTTCTTATTTATATATTTATAACC                    |
|                                                            | PbDHFRutr2Rev               | GGGGTACCCTCTCGAGTGAAATTAATAAAATAAAATACATATCCCTC                |
| <b>Assembly of GOMO plasmids</b>                           | HSPutrFor                   | CGCAATTGATTATTGTCTGTACTTCTTTTGTGAATAG                          |
|                                                            | HSPutrRev                   | ATAAGAATgcgccgcagtGAATTCAAATACCAATAATACCGTTTGGAGAATTG          |
|                                                            | HSPpromFor                  | ATAAGAATGCGGCCGCACAGTGTATATTCCTCAGTTTTCAATGG                   |
|                                                            | HSPpromRev                  | CCGCCTAGGGTAATTGTAATTTATTGGGATAATAATGTTGG                      |
|                                                            | eEFlaPromFor                | ATAAGAATGCGGCCGCCTCGACGATGCTTGTAGATGAGTTAAGC                   |
|                                                            | eEFlaPromRev                | CCGCCTAGGTATAAAATTTTATTTATTTATAAGC                             |
|                                                            | GFPFor                      | CCGCCTAGGAAAATGAGTAAAGGAGAAGAACTTTTCACTGG                      |
|                                                            | GFPRev                      | CCCAAGCTTACTGCCTCCACTGCCTCCACTGCCTCCTTTGTATAGTTTACCCATGCCATGTG |
|                                                            | hDHFRFor                    | CCGTGATCAggtggaggtggaagtgctagc                                 |
|                                                            | hDHFRRev                    | CCGGAATTCttaaacacagtagtatctgtcaccaaaag                         |
|                                                            | yFCUFor                     | CGGgtcgacAAAATGGTTGGTTCGCTAAACTGC                              |
|                                                            | yFCURev                     | CCGggatccACCTCCTCCGCTAGCATCATTCTTC                             |
| <b>Insertion of homologous sequences for gene knockout</b> | PbP230p5' For               | TCCCCGCGGATTTTTATTTTTTCTCGGTTTTCGAAAGG                         |
|                                                            | PbP230p5' rev               | ATAAGAATGCGGCCGCTTAACATCAGTTATCCCTCTGTTATAACG                  |
|                                                            | PbP230p3' For               | CCGCTCGAGATTGTTTTAGCTTGGCGATTTCTGTGTGTG                        |
|                                                            | PbP230p3' rev               | GGGGTACCTGCAACTTATACTAGTGAAGTATCACTGTG                         |
|                                                            | PyP230p5' For               | TCCCCGCGGAAGGAATGACATAATAAAAACCGAAAACC                         |
|                                                            | PyP230p5' rev               | ATAAGAATgcgccgcACATCAGTTACCTCTCTTTTTATAGCGTC                   |
|                                                            | PyP230p3' For               | CCGCTCGAGTTGGGTTTCGTTTTTTCGATTTCTTTGG                          |
|                                                            | PyP230p3' rev               | GGGGTACCTGTATCTTTTTTTAAATGTGCGATTTGTGC                         |
|                                                            | PbSLARP5' For               | TCCCCGCGGACCTATATTTAATACATTTACACCTCCACG                        |
|                                                            | PbSLARP5' rev               | ATAAGAATGCGGCCGctcaTCTCAAAAACATAGGAACGTGCCTTGG                 |
|                                                            | PbSLARP3' For               | CCGCTCGAGCTACTCAAGTATGTTATATTTATGCATGCC                        |
|                                                            | PbSLARP3' rev               | GGGGTACCGAAAATATCTAAGAAAATCATGTAACGACG                         |
| <b>Parasite genotyping</b>                                 | P1 = HSPpromTestRev         | TAATAATGAGTCTTTAGTAACGAATTGCC                                  |
|                                                            | P2 = eEFlaPromTestRev       | TAAGCATAAAGAGCTCGAAAAGAAATTAAGC                                |
|                                                            | P3 = mCherryTestFor         | ATCGTGGAACAGTACGAACGCCGCGAGG                                   |

|                         |                                        |
|-------------------------|----------------------------------------|
| P4 = mCherryTestRev     | <u>TCACCTTCAGCTTGGCGGTCTGG</u>         |
| P5 = GFPTestFor         | <u>GATGGAAGCGTTCAACTAGCAGACC</u>       |
| P6 = PbDHFRTestFor      | <u>TTCATCACGATAAAAATAAATATGGATATGG</u> |
| P7 = PbDHFRTestRev      | <u>CGTATTCAAATACCTGTATTTTTATTCCTC</u>  |
| P8 = HSPutrTestFor      | <u>AAAGTTAAAAAATGATCGGTGTAGTTGG</u>    |
| P9 = PbP230pTest5' For  | <u>TTTATATGACTTAACGGCAATGCCAAAGG</u>   |
| P10 = PbP230pTest3' Rev | <u>AAGTGTTGCAAATATATTACACATGTCATG</u>  |
| P11 = PbP230pTestWTFor  | <u>TCCATTTGATAAATTTGTGATAAAATGTCC</u>  |
| P12 = PbP230pTestWTRev  | <u>TTATGTGTTTCTAGTTCTTTATCTGTTCC</u>   |
| P13 = PyP230pTest5' For | <u>TCTTAATGATTCGTAGATGCTAAGAATTGG</u>  |
| P14 = PyP230pTest3' Rev | <u>ATGCACTATATAAAGATAATGAGAAATGGG</u>  |
| P15 = PyP230pTestWTFor  | <u>AAACACATAATGATGATAATATCCTGAACC</u>  |
| P16 = PyP230pTestWTRev  | <u>TCACAAACATAATTTGGAGTTATTTGATCC</u>  |
| P17 = PbSLARPTest5' For | <u>ACACATCCTAGATATACAACCTTTCATCAAG</u> |
| P18 = PbSLARPTest3' Rev | <u>TTTTAAATTATGAAATAAAATGCCACACC</u>   |
| P19 = PbSLARPTestWTFor  | <u>GAGACATATCAAATAATTACTACATACCACC</u> |
| P20 = PbSLARPTestWTRev  | <u>GGGGTTCATAATTATATTTTCATTAGGGTCC</u> |

Restriction sites in the primer sequences are underlined.



Figure S1

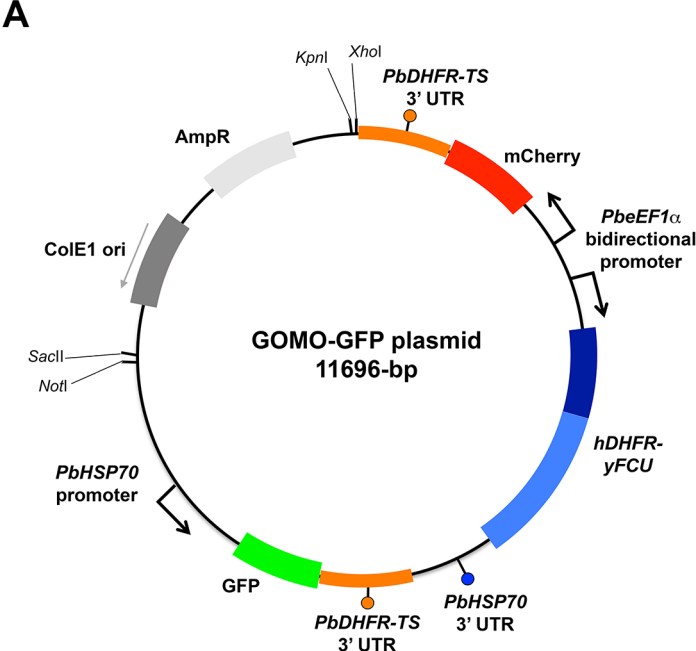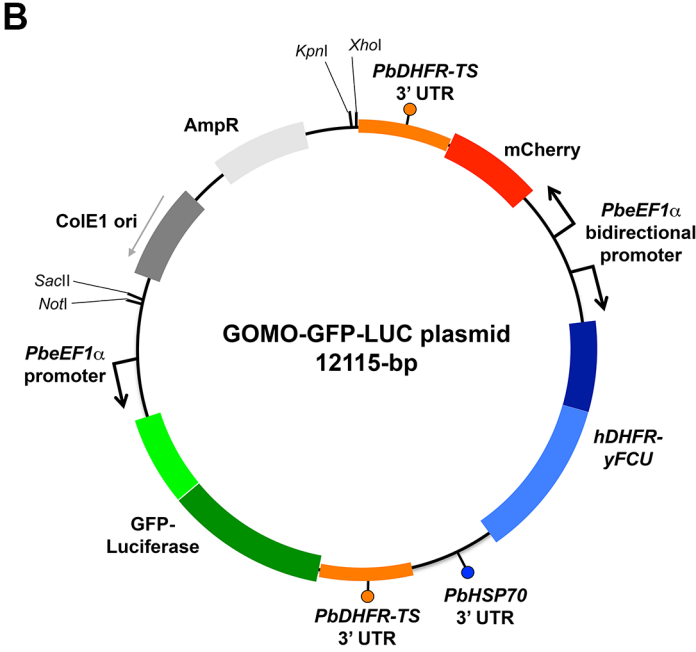

Figure S2

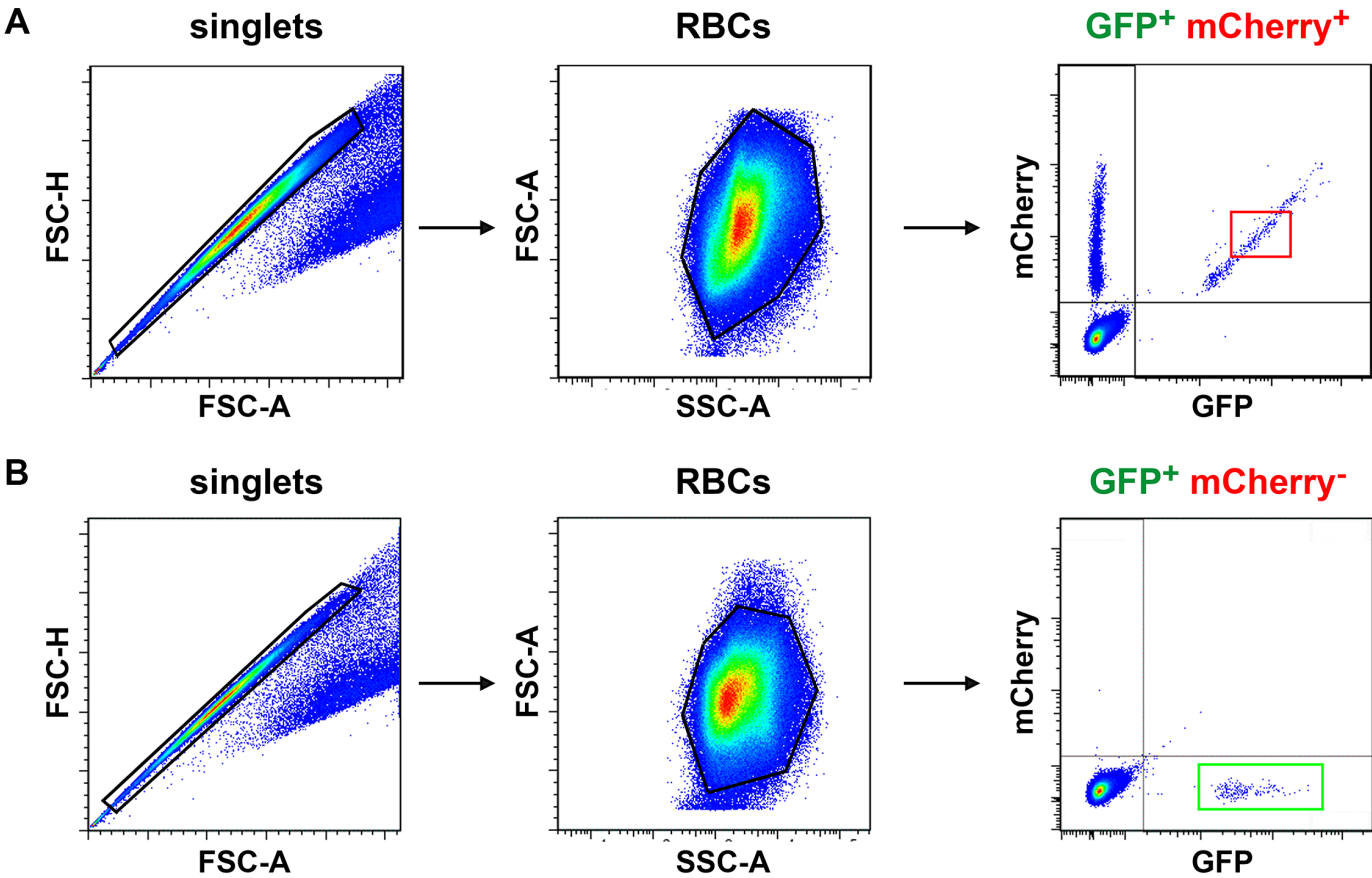

Figure S3

**A**

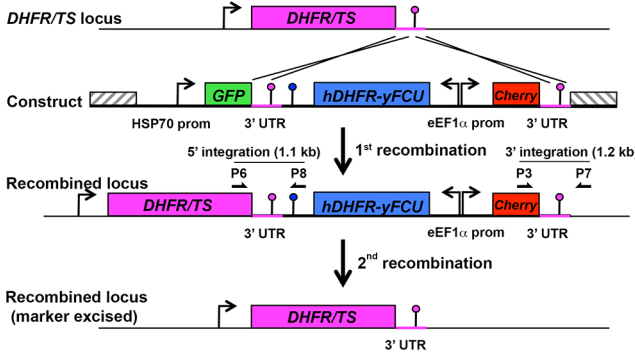

**B**

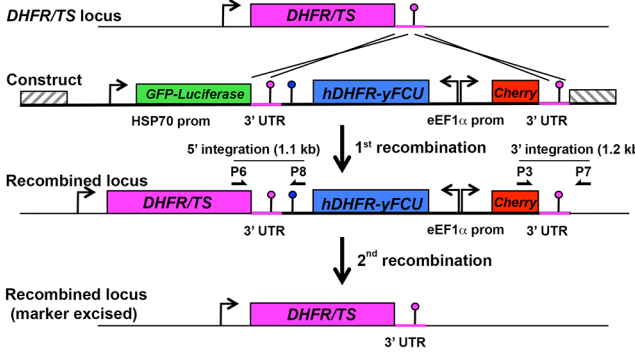

**C**

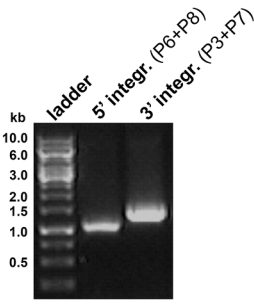

**D**

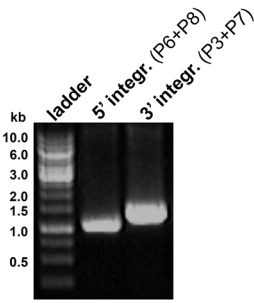

Figure S4

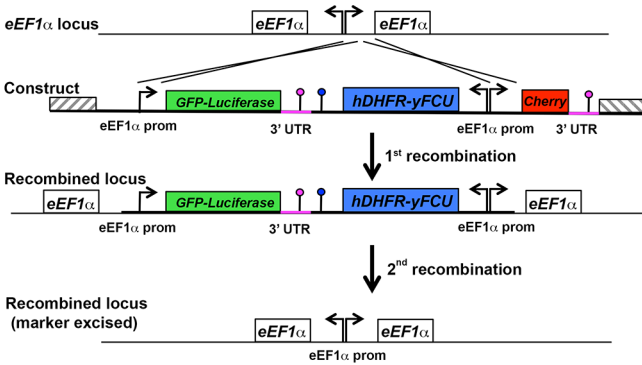

Figure S5

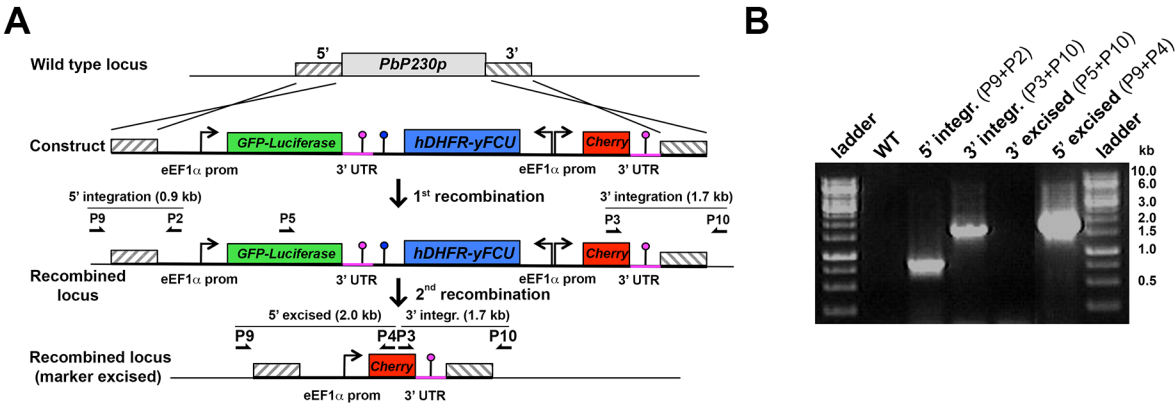

Figure S6

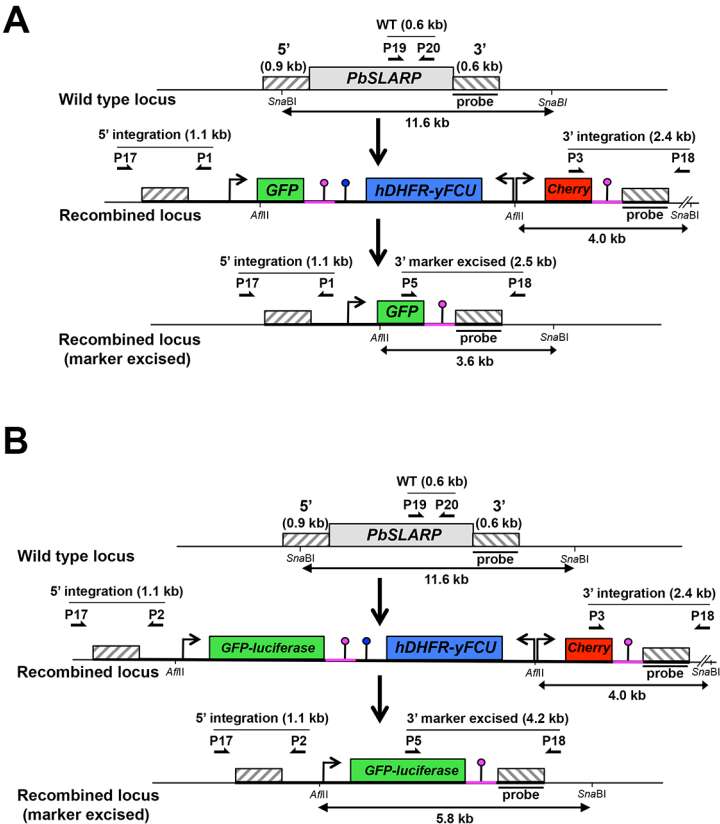

Figure S7

A

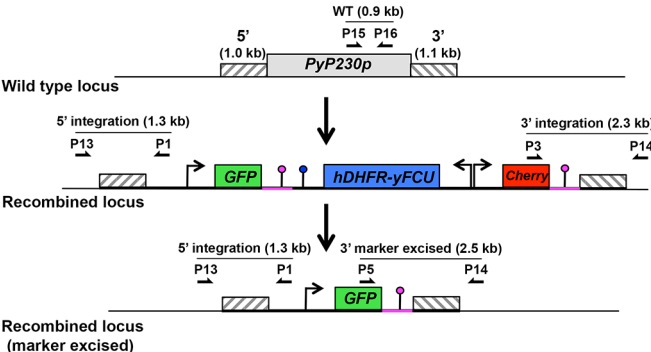

B

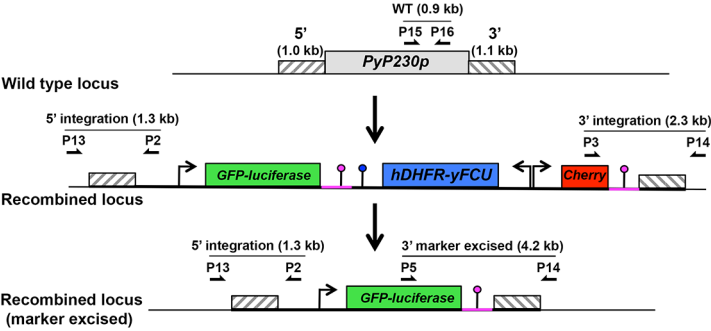

Supplement: srep04760-s1.pdf [file srep04760-s1.pdf]
